# Supplementary figures and images for: Reduced Parasympathetic Reactivation during Recovery from Exercise in Myalgic Encephalomyelitis/Chronic Fatigue Syndrome
Source: MDPI journal article supplement (doi:10.3390/jcm10194527), 2021-09-30

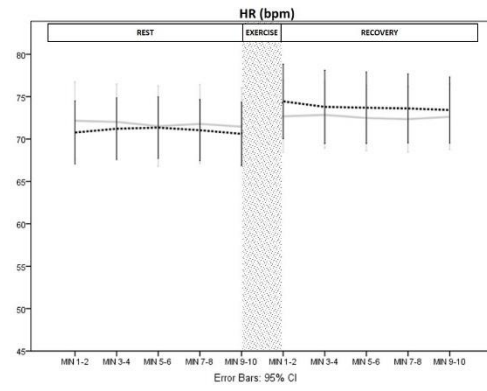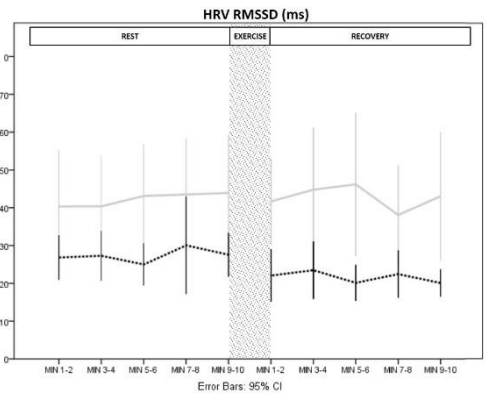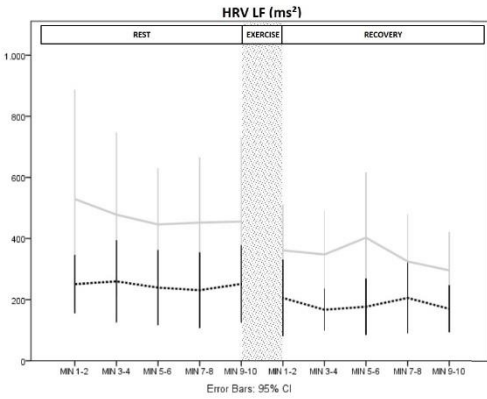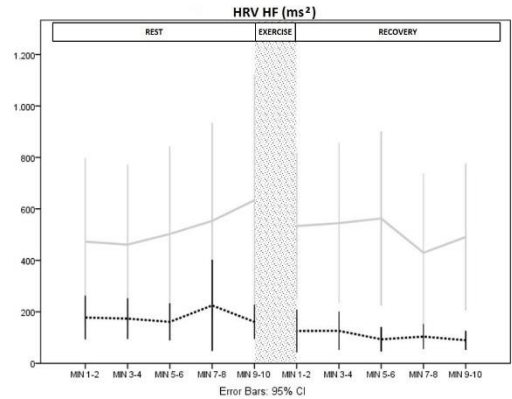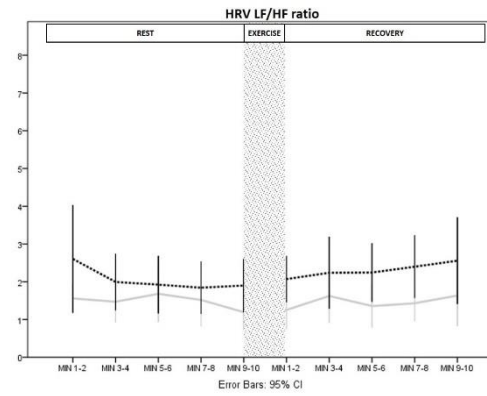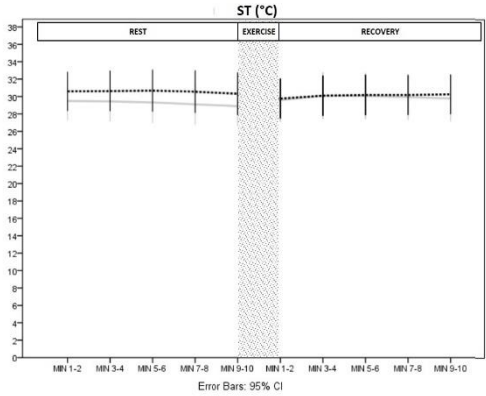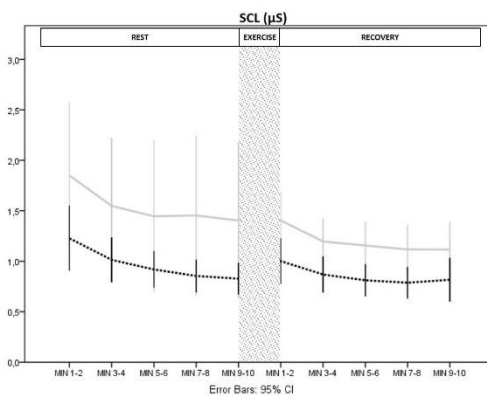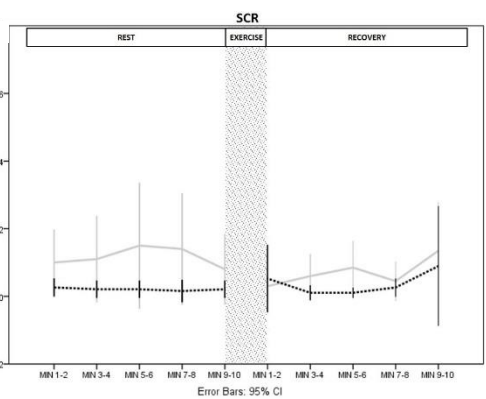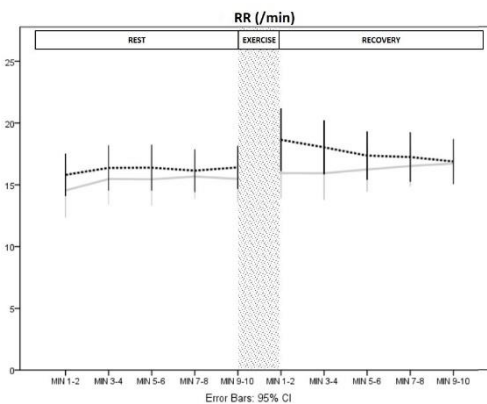

ME/CFS ■

HEALTHY ■

Supplement: s1 [file s1]
